# Supplementary material
Source: PubMed Central journal article supplement (PMC6643453)
Supplement: ao8b01776_si_001.pdf [file ao8b01776_si_001.pdf]

# **Naringin – Chalcone Bioflavonoids Protected Nanocolloids: Mode of Flavonoid Adsorption a Determinant for Protein Extraction**

***Divya Mandial<sup>3</sup>, Poonam Khullar<sup>3</sup>, Harsh Kumar<sup>4</sup>, Gurinder Kaur Ahuwalia<sup>2</sup>,  
Mandeep Singh Bakshi<sup>1\*</sup>***

*<sup>1</sup>Department of Natural and Applied Sciences, University of Wisconsin - Green Bay, 2420 Nicolet Drive, Green Bay, WI 54311-7001, USA. <sup>2</sup>Nanotechnology Research Laboratory, College of North Atlantic, Labrador City, NL A2V 2K7 Canada, <sup>3</sup>Department of Chemistry, B.B.K. D.A.V. College for Women, Amritsar 143005, Punjab, India. <sup>4</sup>Department of Chemistry, Dr. B. R. Ambedkar National Institute of Technology, Jalandhar-144011, Punjab, India.*

# Figure S1

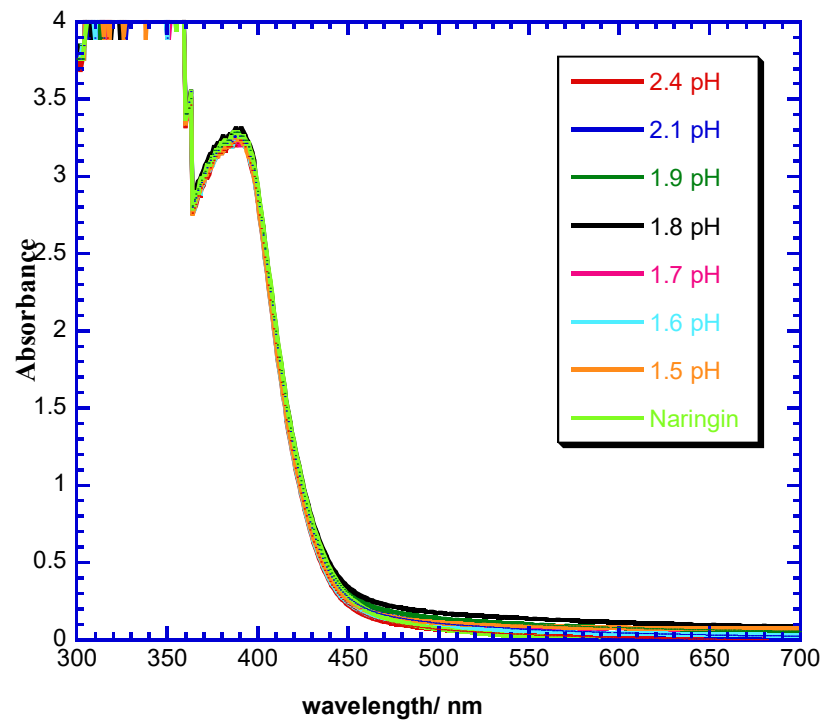

Figure S1. UV-visible titration of HCl to naringin solution to demonstrate the effect of reduction in pH.

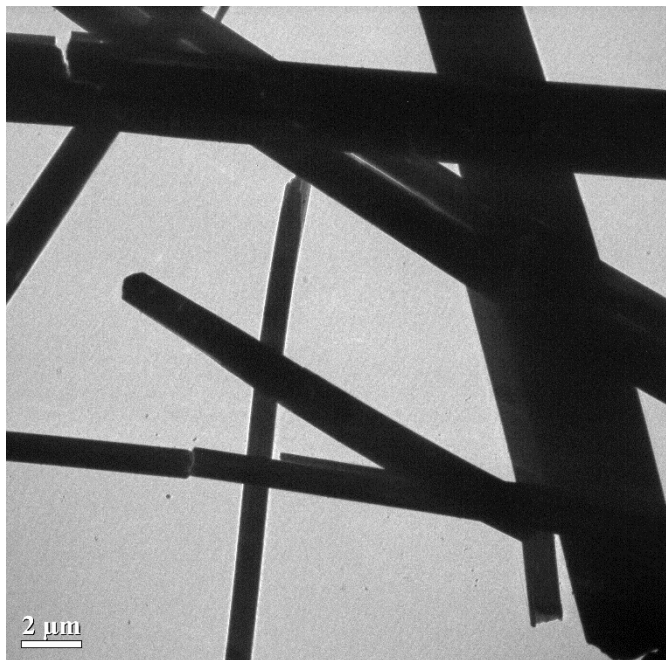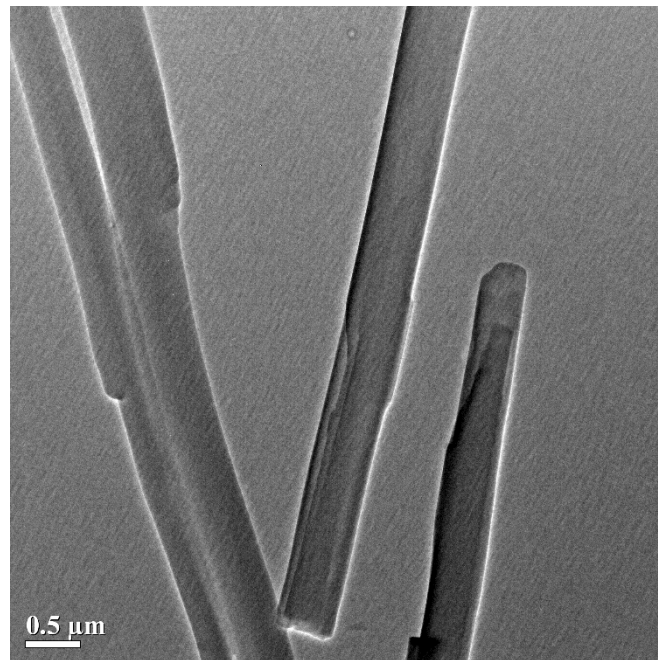

Figure S2. Self-crystallization of naringin during the in situ reaction. See details in the text.

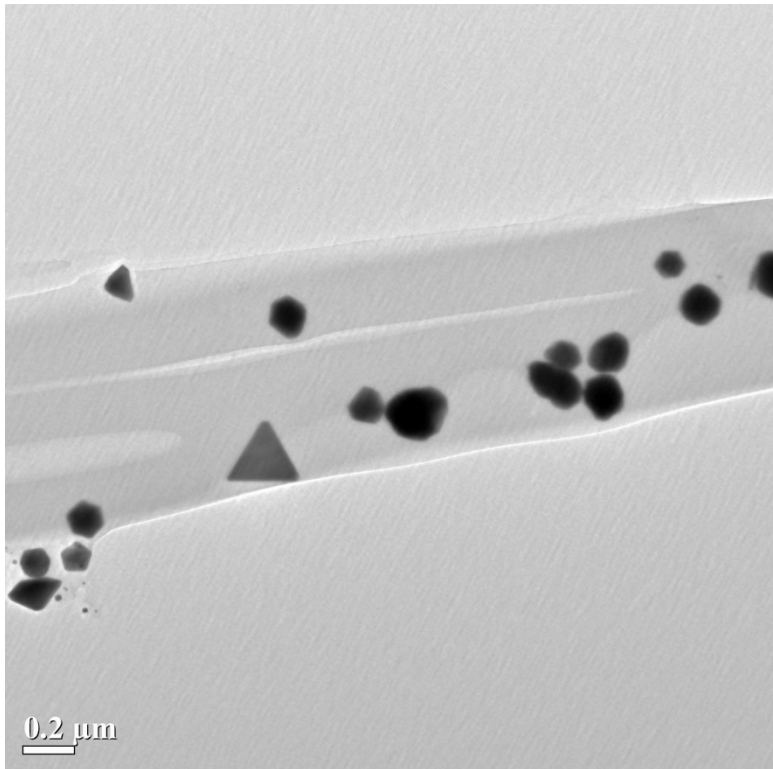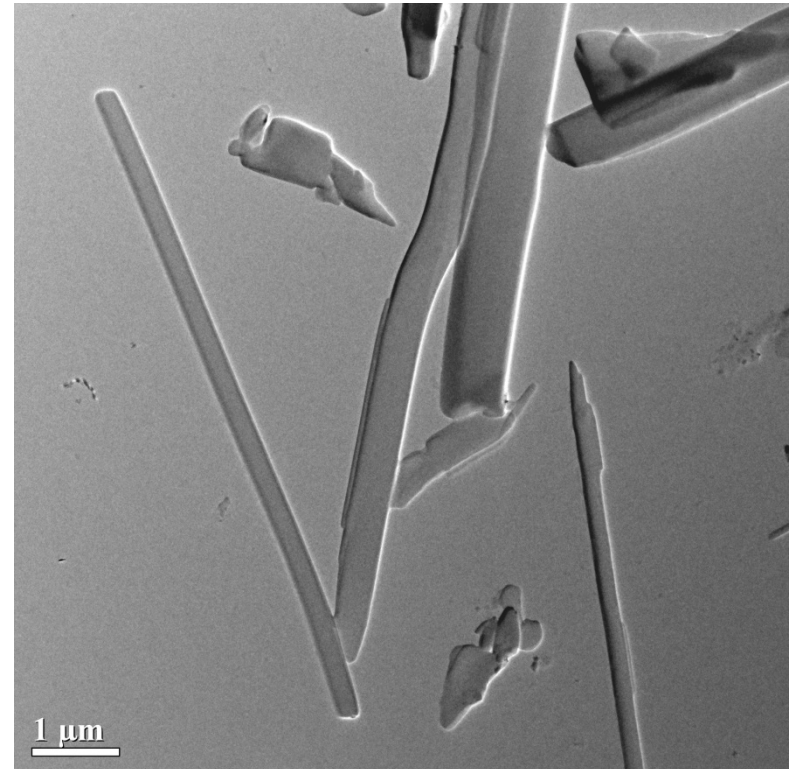

Figure S3. Self-crystallization of naringin during the in situ reaction. Small Ag NPs embedded in the long needle like structures of naringin. See details in the text.

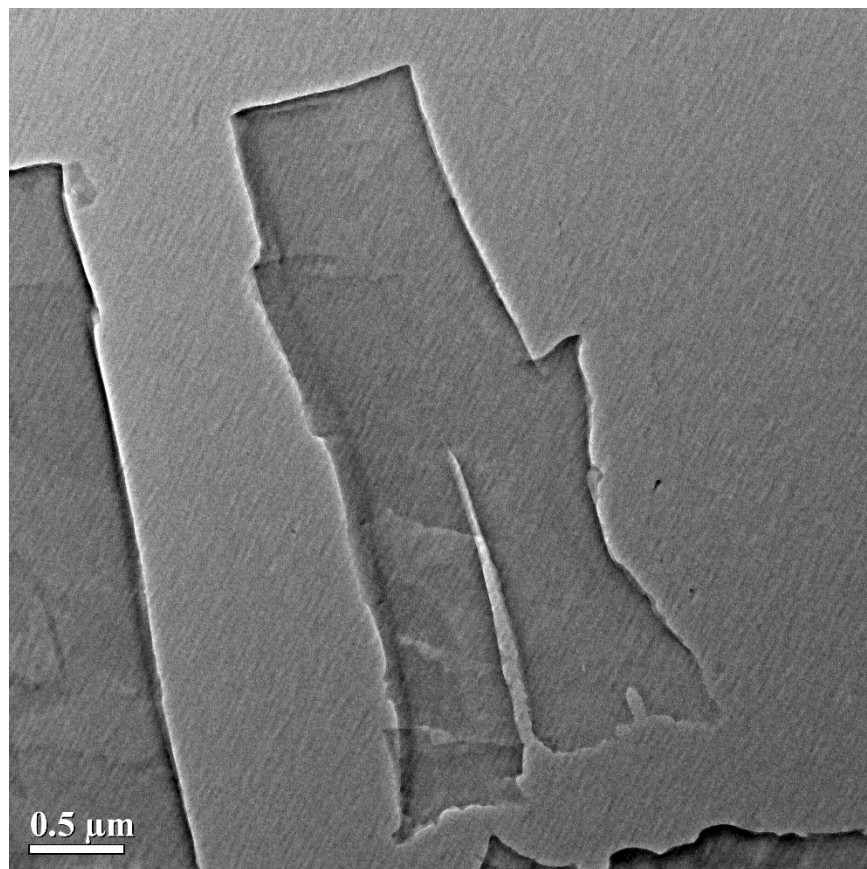

Figure S4. Self-crystallization of naringin in large flake like structures during the in situ reaction in the presence of palladium salt. See details in the text.

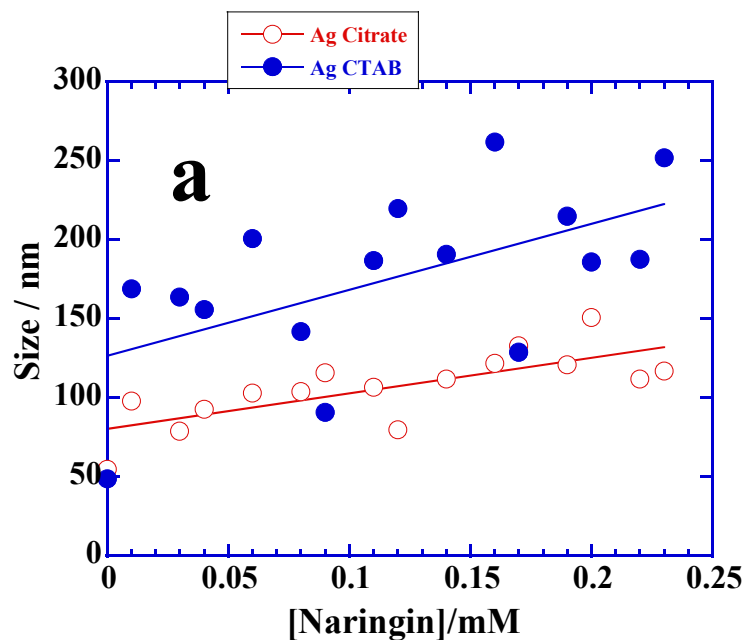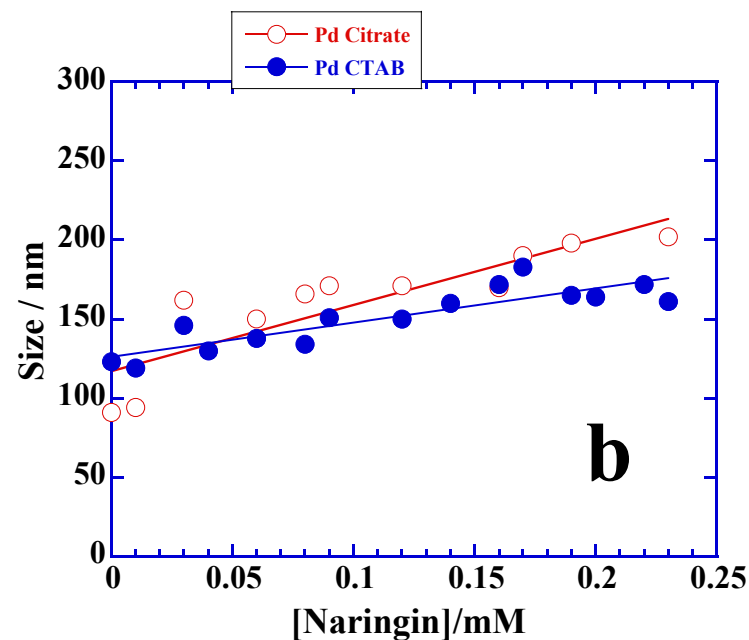

Figure S5. (a) DLS titrations of citrate stabilized and CTAB stabilized seeds with naringin to demonstrate its surface adsorption. (b) Similar titrations of citrate and CTAB stabilized seeds with naringin. See details in the text.
